# Supplementary material for: Evaluation of Brain Targeting and Antipsychotic Activity of Nasally Administrated Ziprasidone Lipid–Polymer Hybrid Nanocarriers
Source: MDPI journal article supplement (doi:10.3390/ph16060886), 2023-06-15
Supplement: s1 [file s1]

# **Supplementary data**

**Table S1. Model summary statistics for particle size (Y1).**

| Source                       | Std. Dev.   | R <sup>2</sup> | Adjusted R <sup>2</sup> | Predicted R <sup>2</sup> | PRESS          |                  |
|------------------------------|-------------|----------------|-------------------------|--------------------------|----------------|------------------|
| Linear                       | 25.48       | 0.6864         | 0.6341                  | 0.5269                   | 23507.76       |                  |
| 2FI                          | 28.14       | 0.7132         | 0.5539                  | 0.1312                   | 43171.24       |                  |
| <b>Quadratic<sup>a</sup></b> | <b>8.39</b> | <b>0.9802</b>  | <b>0.9604</b>           | <b>0.9087</b>            | <b>4534.65</b> | <b>Suggested</b> |
| Cubic                        | 9.18        | 0.9898         | 0.9525                  | 0.3128                   | 34146.63       | Aliased          |

<sup>a</sup> Adequate precision equals 22.71 and coefficient of variation (C.V.) % is 6.02.

**Table S2. Model summary statistics for ziprasidone LPH EE% (Y2).**

| Source           | Std. Dev.   | R <sup>2</sup> | Adjusted R <sup>2</sup> | Predicted R <sup>2</sup> | PRESS         |                  |
|------------------|-------------|----------------|-------------------------|--------------------------|---------------|------------------|
| Linear           | 9.37        | 0.7264         | 0.6808                  | 0.5980                   | 3098.08       |                  |
| 2FI              | 8.28        | 0.8398         | 0.7508                  | 0.5897                   | 3162.32       |                  |
| <b>Quadratic</b> | <b>3.86</b> | <b>0.9730</b>  | <b>0.9459</b>           | <b>0.9195</b>            | <b>620.35</b> | <b>Suggested</b> |
| Cubic            | 4.95        | 0.9809         | 0.9109                  | 0.8028                   | 1519.43       | Aliased          |

**Table S3. ANOVA of the obtained data from BBD for the particle size of ziprasidone LPH and associated p-values.**

| Source                  | Sum of Squares | Df <sup>a</sup> | Mean Square | F-value | p-value <sup>b</sup> |
|-------------------------|----------------|-----------------|-------------|---------|----------------------|
| <b>Model</b>            | 48704.62       | 14              | 3478.90     | 49.45   | < 0.0001             |
| A-PLGA                  | 2187.00        | 1               | 2187.00     | 31.09   | < 0.0001             |
| B-Lecithin: cholesterol | 1170.19        | 1               | 1170.19     | 16.63   | 0.0011               |
| C-Drug amount           | 2523.00        | 1               | 2523.00     | 35.87   | < 0.0001             |
| D-Stirring speed        | 28227.00       | 1               | 28227.00    | 401.26  | < 0.0001             |
| AB                      | 297.56         | 1               | 297.56      | 4.23    | 0.0589               |
| AC                      | 425.39         | 1               | 425.39      | 6.05    | 0.0276               |
| AD                      | 31.64          | 1               | 31.64       | 0.4498  | 0.5133               |
| BC                      | 506.25         | 1               | 506.25      | 7.20    | 0.0179               |
| BD                      | 9.00           | 1               | 9.00        | 0.1279  | 0.7259               |
| CD                      | 62.02          | 1               | 62.02       | 0.8816  | 0.3637               |
| A <sup>2</sup>          | 282.02         | 1               | 282.02      | 4.01    | 0.0650               |
| B <sup>2</sup>          | 1.83           | 1               | 1.83        | 0.0260  | 0.8741               |
| C <sup>2</sup>          | 276.70         | 1               | 276.70      | 3.93    | 0.0673               |
| D <sup>2</sup>          | 11630.23       | 1               | 11630.23    | 165.33  | < 0.0001             |
| <b>Residual</b>         | 984.84         | 14              | 70.35       |         |                      |
| Lack of Fit             | 713.72         | 10              | 71.37       | 1.05    | 0.5250               |
| Pure Error              | 271.12         | 4               | 67.78       |         |                      |
| <b>Cor Total</b>        | 49689.47       | 28              |             |         |                      |

<sup>a</sup> Degree of freedom

<sup>b</sup> \* $p < 0.05$

**Table S4. ANOVA of the obtained data from BBD for the EE% of ziprasidone LPH and associated p-values.**

| <b>Source</b>           | <b>Sum of Squares</b> | <b>df</b> | <b>Mean Square</b> | <b>F-value</b> | <b>p-value</b> |
|-------------------------|-----------------------|-----------|--------------------|----------------|----------------|
| <b>Model</b>            | 7498.68               | 14        | 535.62             | 36.00          | < 0.0001       |
| A-PLGA                  | 113.72                | 1         | 113.72             | 7.64           | 0.0152         |
| B-Lecithin: cholesterol | 71.38                 | 1         | 71.38              | 4.80           | 0.0459         |
| C-Drug amount           | 4938.04               | 1         | 4938.04            | 331.89         | < 0.0001       |
| D-Stirring speed        | 475.25                | 1         | 475.25             | 31.94          | < 0.0001       |
| AB                      | 756.52                | 1         | 756.52             | 50.85          | < 0.0001       |
| AC                      | 29.34                 | 1         | 29.34              | 1.97           | 0.1820         |
| AD                      | 0.0566                | 1         | 0.0566             | 0.0038         | 0.9517         |
| BC                      | 52.34                 | 1         | 52.34              | 3.52           | 0.0817         |
| BD                      | 9.83                  | 1         | 9.83               | 0.6607         | 0.4299         |
| CD                      | 25.70                 | 1         | 25.70              | 1.73           | 0.2099         |
| A <sup>2</sup>          | 247.95                | 1         | 247.95             | 16.66          | 0.0011         |
| B <sup>2</sup>          | 19.77                 | 1         | 19.77              | 1.33           | 0.2683         |
| C <sup>2</sup>          | 772.31                | 1         | 772.31             | 51.91          | < 0.0001       |
| D <sup>2</sup>          | 47.27                 | 1         | 47.27              | 3.18           | 0.0964         |
| <b>Residual</b>         | 208.30                | 14        | 14.88              |                |                |
| Lack of Fit             | 70.25                 | 10        | 7.03               | 0.2036         | 0.9812         |
| Pure Error              | 138.05                | 4         | 34.51              |                |                |
| <b>Cor Total</b>        | 7706.99               | 28        |                    |                |                |

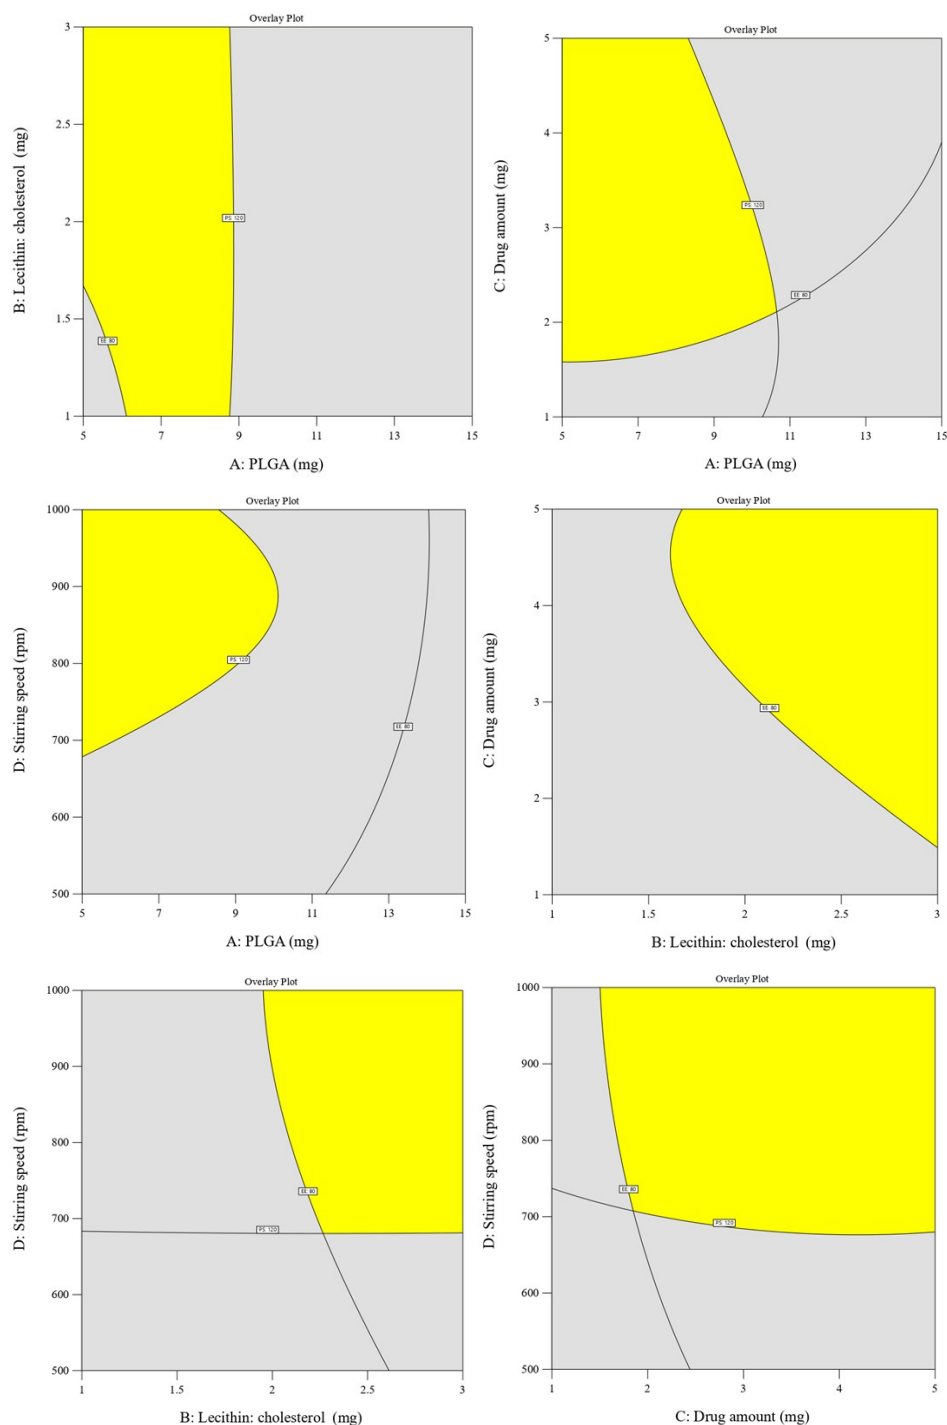

**Figure S1. Overlay plots depicting the design space region for the ziprasidone LPH.** The design space was plotted by overlapping different CPPs influence on CQAs contour plots to obtain QTPP. The yellow area represents the values of CPPs when optimized to fulfill QTPP criteria; minimum particle size and maximum EE%.

**Table S5. The experimental and predicted particle size and EE % of the optimized ziprasidone LPH.**

| <b>Parameter</b>                     | <b>PLGA<br/>amount (mg)</b> | <b>Lecithin:<br/>cholesterol<br/>amount (mg)</b> | <b>Ziprasidone<br/>amount<br/>(mg)</b> | <b>Stirring<br/>speed<br/>(rpm)</b> | <b>Experimental</b> | <b>Predicted</b> | <b>% Pre.<br/>error</b> |
|--------------------------------------|-----------------------------|--------------------------------------------------|----------------------------------------|-------------------------------------|---------------------|------------------|-------------------------|
| Particle size<br>(nm) <sup>a,c</sup> | 5.7                         | 3                                                | 3.4                                    | 850                                 | 97.56±4.55          | 93.59            | 4.06                    |
| EE % <sup>b, c</sup>                 |                             |                                                  |                                        |                                     | 97.98±1.22          | 96.6             | 1.4                     |

<sup>a</sup> Particle size was measured by DLS.

<sup>b</sup> Calculated as percentage of initial ziprasidone added, determined directly by HPLC.

<sup>c</sup> Expressed as mean ± SD (n=3).
